# Supplementary material
Source: publisher figshare collection journal article supplement (https://gsajournals.figshare.com/articles/dataset/_/14810961)
Supplement: Supplementary file 1 [file 1]

# LD-CNV. Supplemental Figures and Tables

LD-CNV: rapid and simple discovery of chromosomal translocations using linkage disequilibrium between copy number variable loci

Luca Comai\*, Kirk Amundson\*, Benny Ordonez\*, Xin Zhao\*<sup>%</sup>, Guilherme Tomaz Braz<sup>†</sup>, Jiming Jiang<sup>†,#</sup>, Isabelle Henry\*

\*Plant Biology and Genome Center, University of California, Davis, California 95616,  
<sup>†</sup>Department of Plant Biology, <sup>#</sup>Department of Horticulture, Michigan State University, East Lansing.

<sup>%</sup>Current address: Institute of Vegetables and Flowers, Chinese Academy of Agricultural Sciences, Beijing

ORCID IDs: 0000-0003-2642-6619 (L.C.); 0000-0003-3435-626X (K.R.A.);  
0000-0003-4554-4354 (B.O.); 0000-0002-6435-6140 (J.J), 0000-0002-6796-1119 (I.M.H.)

Correspondence: Luca Comai, [lcomai@ucdavis.edu](mailto:lcomai@ucdavis.edu)

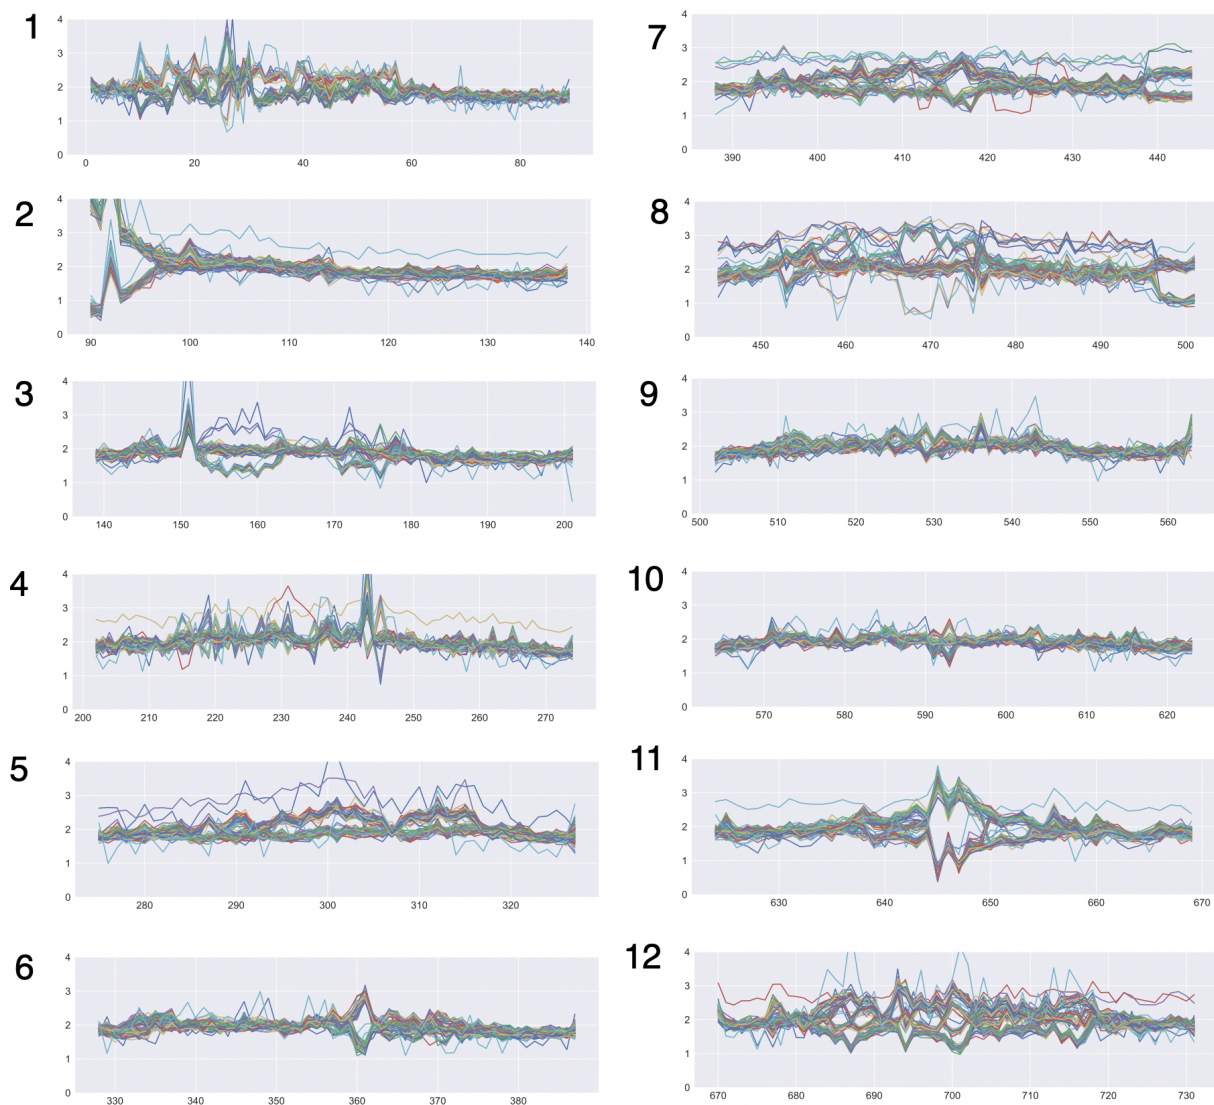

Supplemental Fig. 1. CNV patterns in BB, the dihaploid population of potato cv. PI 310467. The 12 chromosome dosage tracks of 84 2x individuals produced by crossing cv. PI 310467 to haploid inducer IvP48. The outlying tracks evident in some chromosomes, such as 7 and 8, represent trisomic individuals.

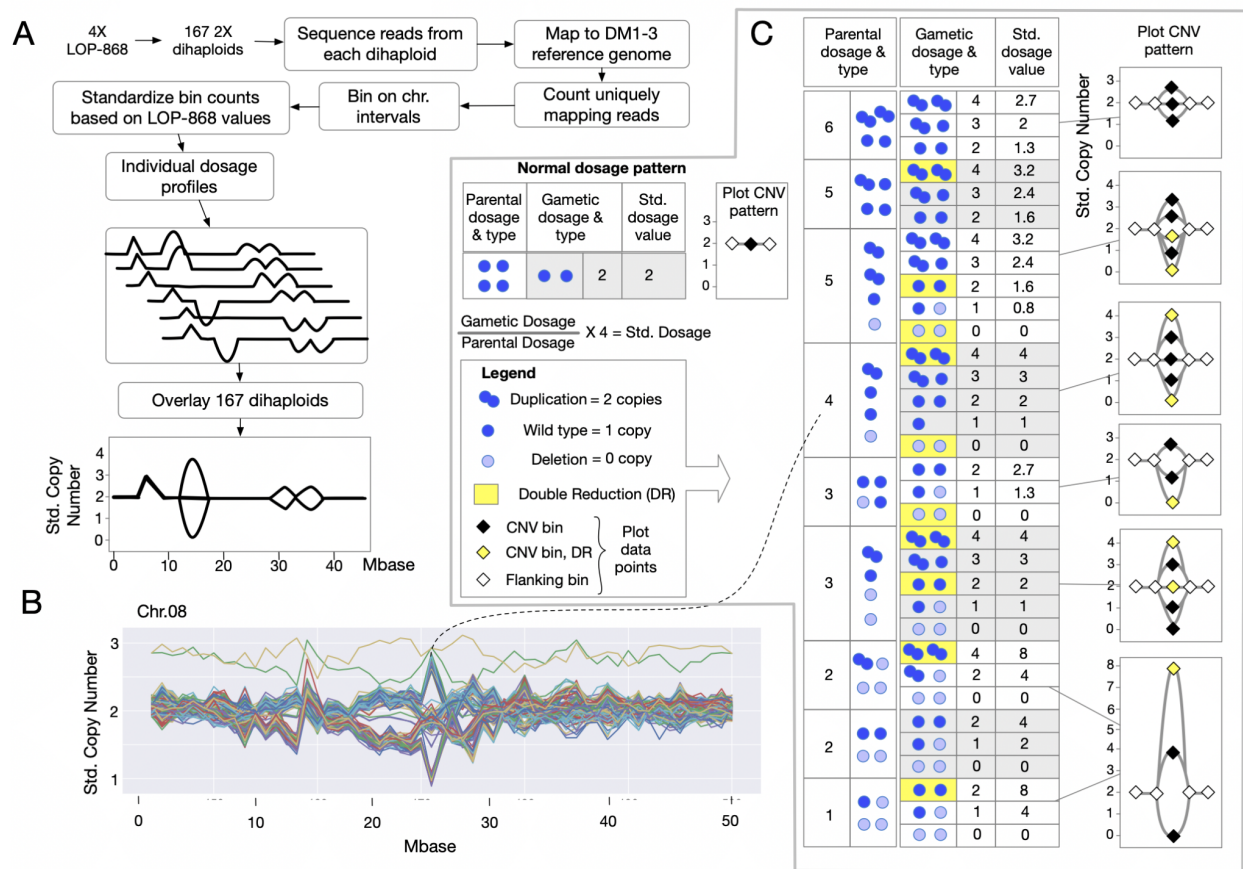

Supplemental Fig. 2. Analysis of CNV.

A. Overview of method to produce the dosage plot using a dihaploid family produced from an autotetraploid parent (LOP868 is the CIP accession name for Alca Tarma, the parent of the LOP population). B. Example of dosage plot resulting from the plotting of dihaploid profiles. Each color represents an individual. The two outliers are trisomics for chr. 8. C. Dosage variation in the autotetraploid parent and resulting segregation patterns in the dihaploids, which represent the maternal gametes. The “Std. Dosage Value” column represents the dihaploid dosage for a given locus relative to the dosage in the tetraploid parent. It is calculated from the formula: (Gametic dosage/parental dosage) \* 4. It corresponds to the value displayed in B.

Dark blue: present allele. Light blue: absent allele (deletion). Overlapping circles represent a duplicated allele inherited as a unit. Yellow cells represent gametes formed by double reduction. Double reduction occurs at low frequency and is dependent on the recombination frequency between the locus of interest and the centromere.

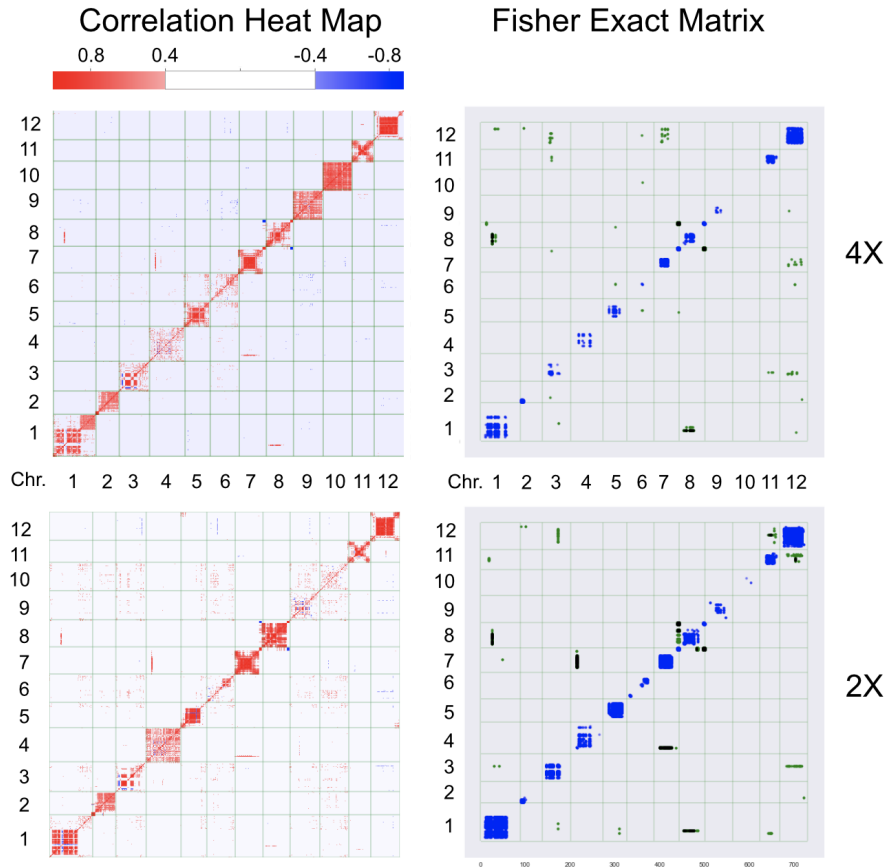

Supplemental Fig. 3. Effect of ploidy and statistical method on LD analysis.

4X analyses used the tetraploids of the BB population. 2X analyses used the diploids. The use of the Pearson's Correlation matrix and the implementation of the FET probability matrix are presented in Methods and are available at [https://github.com/lcomai/cnv\\_mapping](https://github.com/lcomai/cnv_mapping).

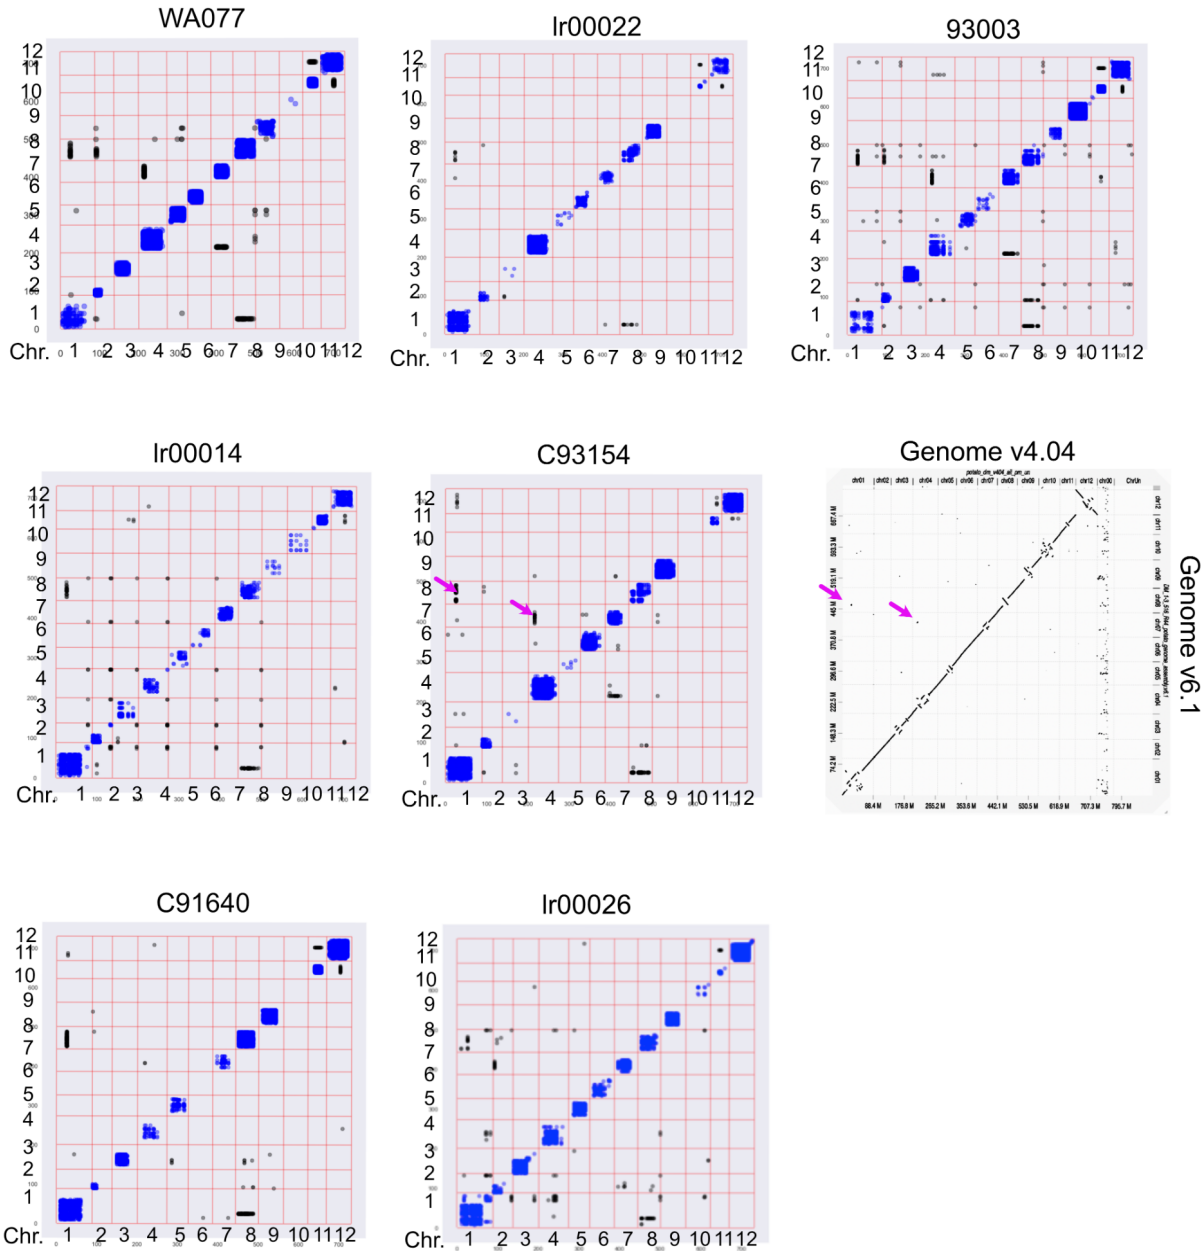

Supplemental Fig. 4. FET probability matrices from seven potato populations. The name of each dihaploid family seed parent is shown on top of each matrix. Blue: intrachromosomal LD. Black: interchromosomal LD. In all cases, the interchromosomal signals are consistent with pericentromeric translocation or misassembly during construction of the reference genome. The 8th matrix is a dot matrix comparison (Cabanettes and Klopp 2018) of the genome assembly version used in this work (4.04) to a more recent one (6.1). The magenta arrows point to regions in chromosome 8 vs 1 and 7 vs 4 that were misassembled in 4.04 and appear “translocated” in multiple population analyses. The absence of the signal in some populations could be due to the lack of segregating CNV in those regions.

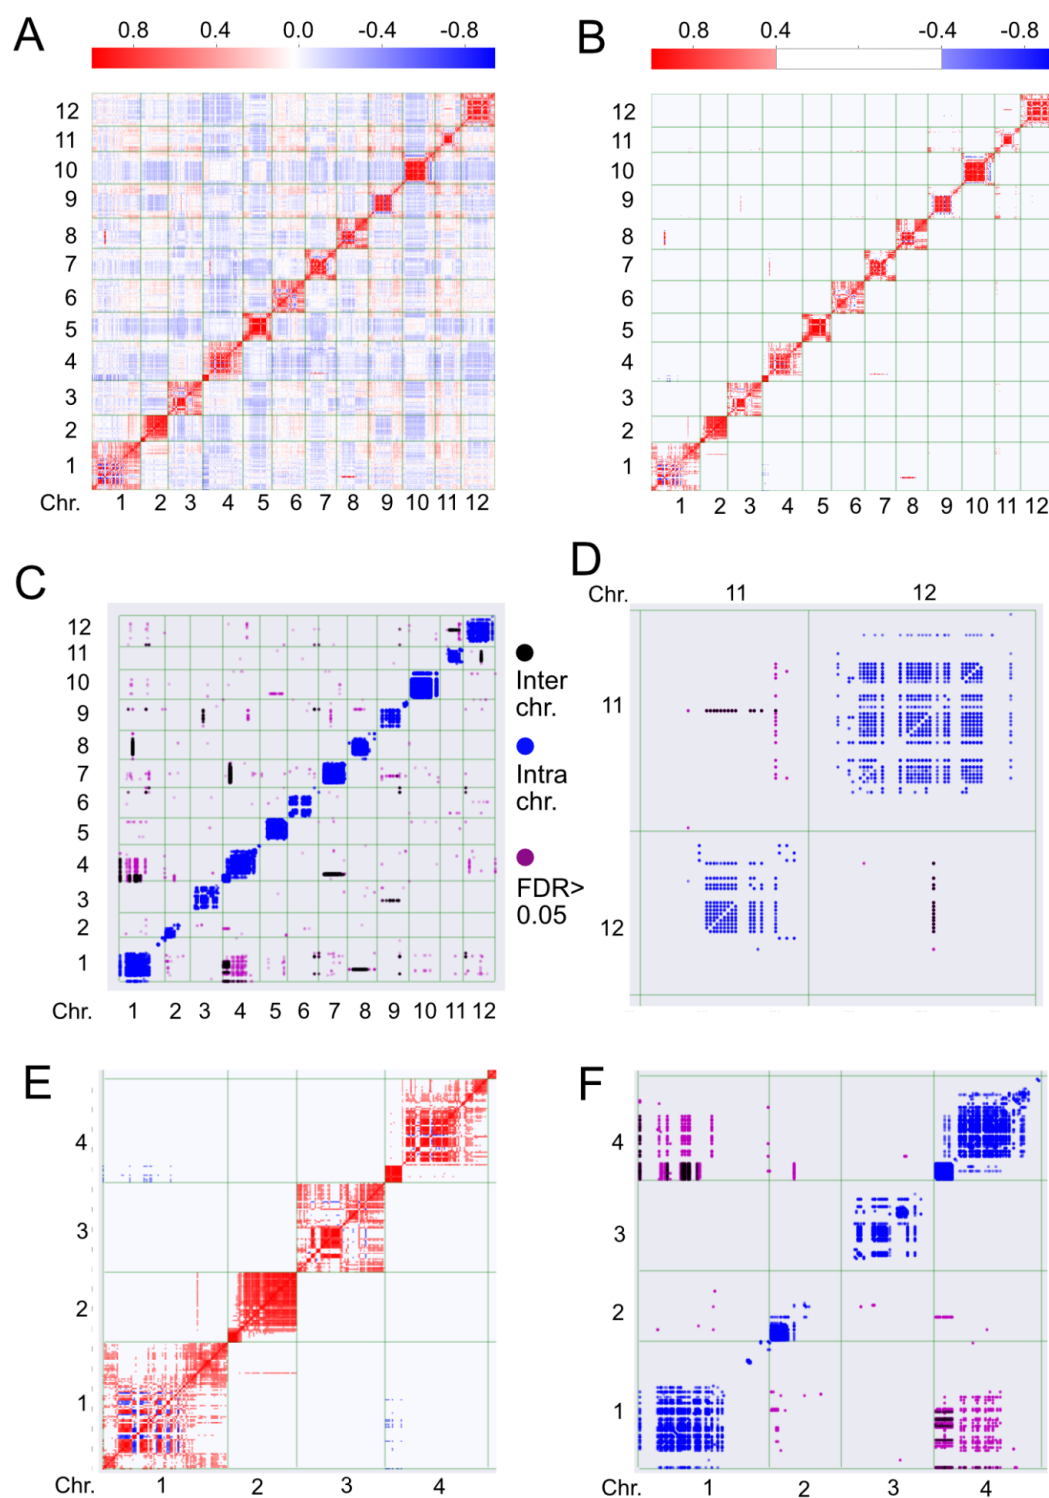

Supplemental Fig. 5. Analysis of the LOP dihaploid family and comparison of Pearson's Correlation and Fisher's exact test for detection of correlated CNV sites.

A. Raw correlation heatmap is less specific and more difficult to interpret than the FET probability matrix. B. Improved heatmap display by filtering low correlation signals. C. Clear demarcation of candidate correlated regions by cluster analysis and Fisher's exact test. A major signal is visible for chromosome 1 and 4. D. Fisher's exact test identifies candidate regions in chr. 11 and 12. This appears to be the same signal displayed by the BB population, suggesting that two different cultivated potatoes share polymorphism. E, F. Side by side comparison of translocation signals in filtered correlation and Fisher's Exact matrices.



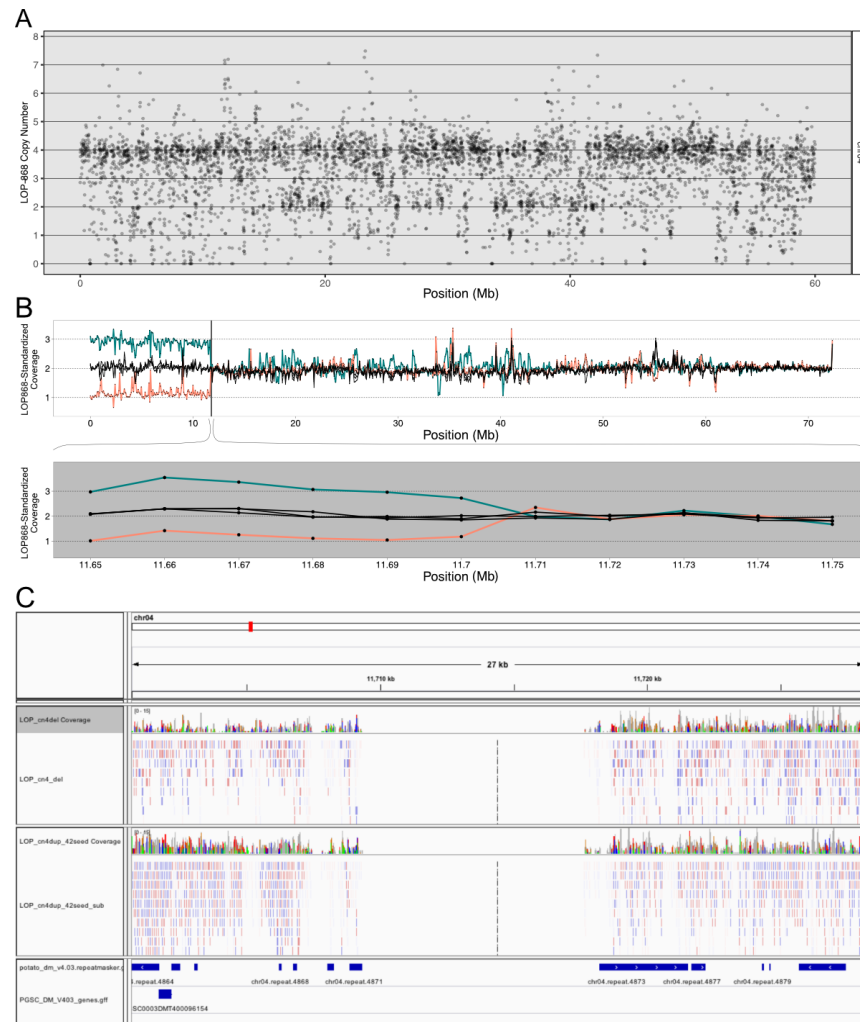

Supplemental Fig. 6. Breakpoint analysis of chromosome 4 short arm CNV.

A) Relative coverage in 4x Alca Tarma over contiguous non-overlapping 1Mb bins of chromosome 4. The affected euchromatic arm is dosage neutral (4 copies). B) Top track: relative mean read coverage in different pools of dihaploids derived from Alca Tarma binned in nonoverlapping 75kb bins. The lines are colored to represent duplicated (3 copies, teal, n=28 dihaploids) or deleted (pink, n=11 dihaploids) copy number states. Shown in black are three control groups, each composed of 20 randomly selected dihaploids with neither the duplicated nor deleted state. Bottom track: the zoomed-in gray region displays higher detail (10kb bins), illustrating the change from 3 or 1 to 2 copies between 11,700,000-11,710,000 bp. C) Browser view bracketing the chromosome 4 breakpoint. The top track displays reads of pooled one-copy dihaploids, the middle track the reads of pooled 3-copy dihaploids. The breakpoint is flanked by repeats 4871 and 4873, both of which are annotated as LTR/Gypsy retrotransposons.



A

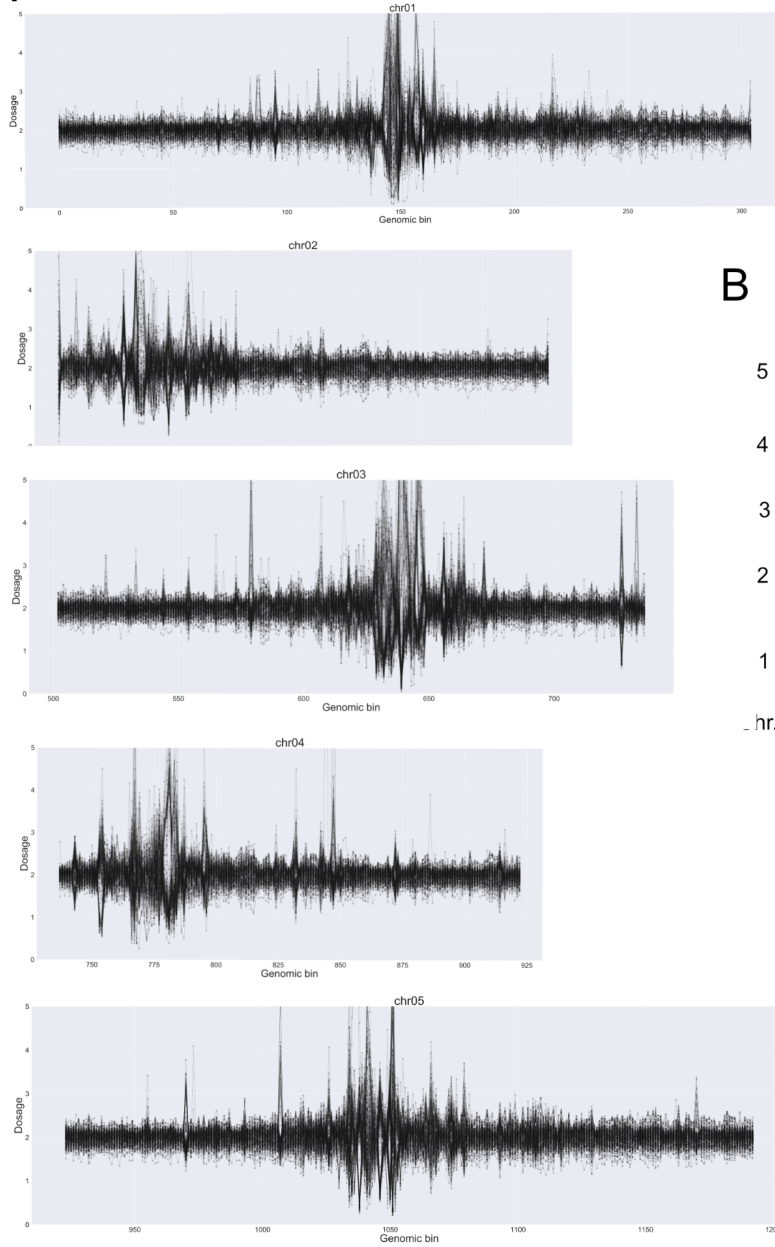

B

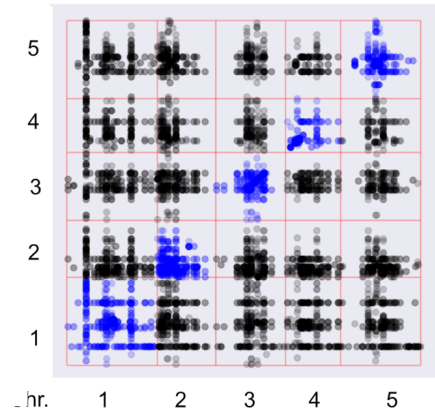

Supplemental Fig. 7. Analysis of CNV in Arabidopsis natural accessions.

A. Chromosomal dosage profiles (chr. 1 to chr. 5, top to bottom) for the 192 *A. thaliana* accessions in Supplemental Table 1. B. FET probability matrix displaying the analysis of dosage state correlation for bins with FDR = 0.05 and for which the dosage difference between peaks is

at least 1. Black: interchromosomal, blue: intrachromosomal. The interchromosomal signals demonstrate LD common to most pericentromeric regions and therefore likely caused by repeats.

Supplemental Table 1. List of potato accessions and sequencing library deposit

| Population Name | Tetraploid parent                                          | Haploid inducer | Project number in NCBI read sequence database, Gb of data                                                                             |
|-----------------|------------------------------------------------------------|-----------------|---------------------------------------------------------------------------------------------------------------------------------------|
| LOP             | Alca Tarma, a.k.a LOP 868                                  | PL-4, IvP101    | PRJNA408137, 313                                                                                                                      |
| BB              | PI 310467, cv. Desiree in GRIN NRSP-6 germplasm collection | IvP48           | PRJNA750855, estimated 300; Binned dosage values are at <a href="https://doi.org/10.25338/B88D2V">https://doi.org/10.25338/B88D2V</a> |
| WA077           | WA077 (CIP397077.16 or cv. Alliance/Sarnav)                | PL-4, IvP101    | PRJNA699631, 1053                                                                                                                     |
| lr00014         | lr00014 (CIP300056.33)                                     |                 |                                                                                                                                       |
| lr00022         | lr00022 (CIP300072.1)                                      |                 |                                                                                                                                       |
| lr00026         | lr00026 (CIP300093.14)                                     |                 |                                                                                                                                       |
| 93003           | 93003 (CIP390637.1)                                        |                 |                                                                                                                                       |
| C91640          | C91640 (CIP388615.22)                                      |                 |                                                                                                                                       |
| C93154          | C93154 (CIP392820.1 or cv. BARI Alu-73)                    |                 |                                                                                                                                       |

Supplemental Table 2. List of Arabidopsis accessions, SRA number and sequencing library characteristics

| <b>Accession + SRR (run name in SRA db at NCBI PRJNA273563)</b> | <b>Reads</b> | <b>Reads/MB</b> |
|-----------------------------------------------------------------|--------------|-----------------|
| admixed-GMI-10_SRR1946059                                       | 59916068     | 500686.84       |
| admixed-GMI-11_SRR1945728                                       | 24022752     | 200745.41       |
| admixed-GMI-12_SRR1945997                                       | 29659042     | 247844.9        |
| admixed-GMI-13_SRR1946061                                       | 33793413     | 282393.65       |
| admixed-GMI-14_SRR1946077                                       | 34644790     | 289508.16       |
| admixed-GMI-15_SRR1945983                                       | 19010462     | 158860.36       |
| admixed-GMI-1_SRR1945626                                        | 19800036     | 165458.41       |
| admixed-GMI-2_SRR1946071                                        | 28704624     | 239869.34       |
| admixed-GMI-3_SRR1945491                                        | 40568849     | 339012.38       |
| admixed-GMI-4_SRR1946022                                        | 36515150     | 305137.77       |
| admixed-GMI-5_SRR1945490                                        | 16039451     | 134033.2        |
| admixed-GMI-6_SRR1945623                                        | 19421444     | 162294.72       |
| admixed-GMI-7_SRR1946069                                        | 21392755     | 178767.92       |
| admixed-GMI-8_SRR1946070                                        | 30120943     | 251704.77       |
| admixed-GMI-9_SRR1945638                                        | 32841499     | 274439.01       |
| admixed-Monsanto-10_SRR1945537                                  | 9055319      | 75670.5         |
| admixed-Monsanto-11_SRR1946183                                  | 16810601     | 140477.29       |
| admixed-Monsanto-12_SRR1946126                                  | 17673420     | 147687.41       |
| admixed-Monsanto-13_SRR1946184                                  | 21228594     | 177396.12       |
| admixed-Monsanto-14_SRR1946471                                  | 13767340     | 115046.37       |
| admixed-Monsanto-15_SRR1946400                                  | 12540265     | 104792.35       |
| admixed-Monsanto-1_SRR1945940                                   | 10699758     | 89412.21        |
| admixed-Monsanto-2_SRR1945519                                   | 15019671     | 125511.43       |
| admixed-Monsanto-3_SRR1946108                                   | 17166146     | 143448.39       |

|                               |          |           |
|-------------------------------|----------|-----------|
| admixed-Monsanto-4_SRR1946149 | 15577834 | 130175.71 |
| admixed-Monsanto-5_SRR1946418 | 5990357  | 50058.24  |
| admixed-Monsanto-6_SRR1946135 | 17295878 | 144532.49 |
| admixed-Monsanto-7_SRR1945556 | 9700463  | 81061.63  |
| admixed-Monsanto-8_SRR1946479 | 17924451 | 149785.14 |
| admixed-Monsanto-9_SRR1946438 | 13674684 | 114272.09 |
| asia-GMI-1_SRR1946559         | 28507994 | 238226.21 |
| asia-GMI-2_SRR1946560         | 55378823 | 462771.49 |
| asia-GMI-3_SRR1946561         | 41916903 | 350277.36 |
| asia-GMI-4_SRR1946558         | 25864327 | 216134.48 |
| asia-GMI-5_SRR1946555         | 27246541 | 227684.91 |
| asia-GMI-6_SRR1946566         | 35257170 | 294625.49 |
| asia-GMI-7_SRR1946557         | 24278378 | 202881.54 |
| asia-GMI-8_SRR1946565         | 41394961 | 345915.76 |
| asia-GMI-9_SRR1946556         | 27748807 | 231882.08 |
| asia-Monsanto-10_SRR1946049   | 30564177 | 255408.64 |
| asia-Monsanto-11_SRR1946212   | 12655516 | 105755.44 |
| asia-Monsanto-12_SRR1946225   | 12970324 | 108386.13 |
| asia-Monsanto-13_SRR1946218   | 9342590  | 78071.08  |
| asia-Monsanto-14_SRR1946312   | 9520464  | 79557.47  |
| asia-Monsanto-15_SRR1946203   | 13293030 | 111082.81 |
| asia-Monsanto-1_SRR1946229    | 11167396 | 93320.01  |
| asia-Monsanto-2_SRR1946214    | 9013359  | 75319.87  |
| asia-Monsanto-3_SRR1946219    | 8855134  | 73997.66  |
| asia-Monsanto-4_SRR1946224    | 9790332  | 81812.62  |
| asia-Monsanto-5_SRR1946199    | 12179493 | 101777.57 |
| asia-Monsanto-6_SRR1946201    | 11459167 | 95758.19  |
| asia-Monsanto-7_SRR1946221    | 12692203 | 106062.02 |

|                                       |          |           |
|---------------------------------------|----------|-----------|
| asia-Monsanto-8_SRR1946050            | 23325425 | 194918.22 |
| asia-Monsanto-9_SRR1946216            | 11455734 | 95729.5   |
| central_europe-GMI-1_SRR1946008       | 19335113 | 161573.3  |
| central_europe-GMI-2_SRR1946569       | 40264985 | 336473.15 |
| central_europe-GMI-3_SRR1946563       | 69280709 | 578942.19 |
| central_europe-GMI-4_SRR1946562       | 63443436 | 530163.19 |
| central_europe-GMI-5_SRR1945724       | 20054005 | 167580.7  |
| central_europe-GMI-6_SRR1946564       | 68211731 | 570009.3  |
| central_europe-GMI-7_SRR1946568       | 36714388 | 306802.69 |
| central_europe-GMI-8_SRR1946567       | 44576218 | 372499.84 |
| central_europe-Monsanto-10_SRR1946230 | 12765831 | 106677.29 |
| central_europe-Monsanto-11_SRR1946268 | 19014619 | 158895.1  |
| central_europe-Monsanto-12_SRR1945887 | 11104130 | 92791.33  |
| central_europe-Monsanto-13_SRR1946343 | 20579298 | 171970.29 |
| central_europe-Monsanto-14_SRR1946465 | 11770417 | 98359.14  |
| central_europe-Monsanto-15_SRR1946247 | 10763715 | 89946.66  |
| central_europe-Monsanto-1_SRR1946249  | 9821512  | 82073.17  |
| central_europe-Monsanto-2_SRR1946252  | 13265534 | 110853.04 |
| central_europe-Monsanto-3_SRR1945443  | 16016473 | 133841.18 |
| central_europe-Monsanto-4_SRR1946263  | 15117094 | 126325.55 |
| central_europe-Monsanto-5_SRR1946254  | 14385342 | 120210.68 |
| central_europe-Monsanto-6_SRR1946272  | 11963830 | 99975.39  |
| central_europe-Monsanto-7_SRR1946266  | 20927166 | 174877.24 |
| central_europe-Monsanto-8_SRR1946363  | 22051503 | 184272.73 |
| central_europe-Monsanto-9_SRR1946369  | 21010693 | 175575.23 |
| germany-GMI-10_SRR1946094             | 64112581 | 535754.88 |
| germany-GMI-11_SRR1946103             | 20588686 | 172048.74 |
| germany-GMI-12_SRR1945757             | 14245174 | 119039.37 |

|                                              |          |           |
|----------------------------------------------|----------|-----------|
| germany-GMI-1_SRR1946009                     | 17541288 | 146583.25 |
| germany-GMI-2_SRR1945729                     | 79383009 | 663361.76 |
| germany-GMI-3_SRR1945696                     | 25408557 | 212325.85 |
| germany-GMI-4_SRR1945793                     | 28859058 | 241159.86 |
| germany-GMI-5_SRR1945727                     | 10380604 | 86745.21  |
| germany-GMI-6_SRR1945726                     | 23114360 | 193154.46 |
| germany-GMI-7_SRR1945943                     | 17913268 | 149691.69 |
| germany-GMI-8_SRR1945944                     | 10227695 | 85467.43  |
| germany-GMI-9_SRR1945730                     | 57664135 | 481868.63 |
| germany-Monsanto-10_SRR1945873               | 9570405  | 79974.81  |
| germany-Monsanto-11_SRR1945468               | 15082766 | 126038.69 |
| germany-Monsanto-12_SRR1945575               | 17094637 | 142850.83 |
| germany-Monsanto-13_SRR1945960               | 8887338  | 74266.78  |
| germany-Monsanto-14_SRR1945507               | 23900073 | 199720.25 |
| germany-Monsanto-15_SRR1945513               | 15828270 | 132268.47 |
| germany-Monsanto-1_SRR1945515                | 14431836 | 120599.21 |
| germany-Monsanto-2_SRR1945474                | 10955767 | 91551.54  |
| germany-Monsanto-3_SRR1945473                | 22297592 | 186329.17 |
| germany-Monsanto-4_SRR1945961                | 9722146  | 81242.82  |
| germany-Monsanto-5_SRR1945538                | 14253405 | 119108.16 |
| germany-Monsanto-6_SRR1946469                | 15668800 | 130935.86 |
| germany-Monsanto-7_SRR1945583                | 22458306 | 187672.17 |
| germany-Monsanto-8_SRR1945531                | 19783897 | 165323.55 |
| germany-Monsanto-9_SRR1945554                | 9266572  | 77435.83  |
| italy_balkan_caucasus-Monsanto-10_SRR1946282 | 7402735  | 61860.74  |
| italy_balkan_caucasus-Monsanto-11_SRR1946297 | 19763662 | 165154.45 |
| italy_balkan_caucasus-Monsanto-12_SRR1946240 | 9828609  | 82132.48  |
| italy_balkan_caucasus-Monsanto-13_SRR1946032 | 18279195 | 152749.55 |



|                                              |          |           |
|----------------------------------------------|----------|-----------|
| italy_balkan_caucasus-Monsanto-14_SRR1946321 | 10435351 | 87202.7   |
| italy_balkan_caucasus-Monsanto-15_SRR1946323 | 21265077 | 177700.98 |
| italy_balkan_caucasus-Monsanto-1_SRR1946288  | 11969392 | 100021.87 |
| italy_balkan_caucasus-Monsanto-2_SRR1946046  | 16701439 | 139565.08 |
| italy_balkan_caucasus-Monsanto-3_SRR1946301  | 9280705  | 77553.94  |
| italy_balkan_caucasus-Monsanto-4_SRR1946023  | 13498714 | 112801.6  |
| italy_balkan_caucasus-Monsanto-5_SRR1946291  | 11484184 | 95967.24  |
| italy_balkan_caucasus-Monsanto-6_SRR1946036  | 31954866 | 267029.89 |
| italy_balkan_caucasus-Monsanto-7_SRR1946292  | 14538360 | 121489.37 |
| italy_balkan_caucasus-Monsanto-8_SRR1946025  | 19477965 | 162767.04 |
| italy_balkan_caucasus-Monsanto-9_SRR1946295  | 11013689 | 92035.57  |
| north_sweden-GMI-10_SRR1945690               | 35646246 | 297876.8  |
| north_sweden-GMI-11_SRR1945716               | 13063824 | 109167.46 |
| north_sweden-GMI-12_SRR1946090               | 37244466 | 311232.27 |
| north_sweden-GMI-13_SRR1946007               | 18173335 | 151864.93 |
| north_sweden-GMI-14_SRR1945632               | 21309495 | 178072.16 |
| north_sweden-GMI-15_SRR1945630               | 26677852 | 222932.68 |
| north_sweden-GMI-1_SRR1945604                | 16929373 | 141469.8  |
| north_sweden-GMI-2_SRR1945715                | 16638157 | 139036.26 |
| north_sweden-GMI-3_SRR1945697                | 34935477 | 291937.28 |
| north_sweden-GMI-4_SRR1945694                | 26013634 | 217382.16 |
| north_sweden-GMI-5_SRR1945607                | 38118179 | 318533.43 |
| north_sweden-GMI-6_SRR1945605                | 58226536 | 486568.32 |
| north_sweden-GMI-7_SRR1945711                | 36444439 | 304546.87 |
| north_sweden-GMI-8_SRR1945691                | 24890971 | 208000.66 |
| north_sweden-GMI-9_SRR1946064                | 17125390 | 143107.81 |
| relict-Monsanto-10_SRR1946427                | 11670262 | 97522.2   |
| relict-Monsanto-11_SRR1946195                | 11254133 | 94044.83  |

|                                |          |           |
|--------------------------------|----------|-----------|
| relict-Monsanto-12_SRR1946393  | 13088955 | 109377.46 |
| relict-Monsanto-13_SRR1946152  | 18967479 | 158501.18 |
| relict-Monsanto-14_SRR1946443  | 16060723 | 134210.95 |
| relict-Monsanto-15_SRR1946398  | 17903397 | 149609.21 |
| relict-Monsanto-1_SRR1946147   | 20211669 | 168898.21 |
| relict-Monsanto-2_SRR1946143   | 14356021 | 119965.66 |
| relict-Monsanto-3_SRR1946168   | 16425998 | 137263.36 |
| relict-Monsanto-4_SRR1946140   | 17347996 | 144968.01 |
| relict-Monsanto-5_SRR1946192   | 20661996 | 172661.36 |
| relict-Monsanto-6_SRR1946190   | 13805415 | 115364.54 |
| relict-Monsanto-7_SRR1946436   | 18121950 | 151435.54 |
| relict-Monsanto-8_SRR1946132   | 16429270 | 137290.71 |
| relict-Monsanto-9_SRR1946458   | 9246205  | 77265.64  |
| south_sweden-GMI-10_SRR1946101 | 40376693 | 337406.64 |
| south_sweden-GMI-11_SRR1945636 | 15148525 | 126588.2  |
| south_sweden-GMI-12_SRR1945648 | 39477578 | 329893.21 |
| south_sweden-GMI-13_SRR1945698 | 19662788 | 164311.5  |
| south_sweden-GMI-14_SRR1946100 | 38782621 | 324085.82 |
| south_sweden-GMI-15_SRR1945660 | 27492214 | 229737.87 |
| south_sweden-GMI-1_SRR1945633  | 35549994 | 297072.47 |
| south_sweden-GMI-2_SRR1945637  | 38539759 | 322056.35 |
| south_sweden-GMI-3_SRR1945683  | 35359557 | 295481.09 |
| south_sweden-GMI-4_SRR1945996  | 28208636 | 235724.63 |
| south_sweden-GMI-5_SRR1945964  | 15576292 | 130162.82 |
| south_sweden-GMI-6_SRR1945477  | 19110039 | 159692.47 |
| south_sweden-GMI-7_SRR1945707  | 30146186 | 251915.71 |
| south_sweden-GMI-8_SRR1946087  | 39000378 | 325905.5  |
| south_sweden-GMI-9_SRR1946092  | 23810485 | 198971.61 |

|                                       |          |           |
|---------------------------------------|----------|-----------|
| south_sweden-Monsanto-1_SRR1945906    | 11470851 | 95855.83  |
| spain-Monsanto-10_SRR1946155          | 15160643 | 126689.46 |
| spain-Monsanto-11_SRR1946151          | 13526890 | 113037.05 |
| spain-Monsanto-12_SRR1946402          | 14183058 | 118520.3  |
| spain-Monsanto-13_SRR1946435          | 16866069 | 140940.8  |
| spain-Monsanto-14_SRR1946412          | 12964849 | 108340.38 |
| spain-Monsanto-15_SRR1946451          | 16753696 | 140001.76 |
| spain-Monsanto-1_SRR1946437           | 13150132 | 109888.69 |
| spain-Monsanto-2_SRR1946381           | 12589966 | 105207.68 |
| spain-Monsanto-3_SRR1946404           | 8464114  | 70730.12  |
| spain-Monsanto-4_SRR1946453           | 15113990 | 126299.61 |
| spain-Monsanto-5_SRR1946426           | 14461779 | 120849.43 |
| spain-Monsanto-6_SRR1946154           | 17281639 | 144413.5  |
| spain-Monsanto-7_SRR1946133           | 20868196 | 174384.46 |
| spain-Monsanto-8_SRR1946167           | 18623040 | 155622.88 |
| spain-Monsanto-9_SRR1946454           | 18006844 | 150473.66 |
| western_europe-GMI-1_SRR1945657       | 26646916 | 222674.16 |
| western_europe-Monsanto-10_SRR1946389 | 13761980 | 115001.58 |
| western_europe-Monsanto-11_SRR1945553 | 7896785  | 65989.25  |
| western_europe-Monsanto-12_SRR1946480 | 11433818 | 95546.36  |
| western_europe-Monsanto-13_SRR1945456 | 21387945 | 178727.73 |
| western_europe-Monsanto-14_SRR1946407 | 19483841 | 162816.14 |
| western_europe-Monsanto-15_SRR1945552 | 16259172 | 135869.29 |
| western_europe-Monsanto-1_SRR1946464  | 7161758  | 59847.02  |
| western_europe-Monsanto-2_SRR1946372  | 15399476 | 128685.26 |
| western_europe-Monsanto-3_SRR1945568  | 21045538 | 175866.41 |
| western_europe-Monsanto-4_SRR1945891  | 19333214 | 161557.43 |
| western_europe-Monsanto-5_SRR1946055  | 12240368 | 102286.27 |

|                                      |          |           |
|--------------------------------------|----------|-----------|
| western_europe-Monsanto-6_SRR1946116 | 11464228 | 95800.48  |
| western_europe-Monsanto-7_SRR1946460 | 10741251 | 89758.95  |
| western_europe-Monsanto-8_SRR1945557 | 14674892 | 122630.3  |
| western_europe-Monsanto-9_SRR1945438 | 18291432 | 152851.81 |
|                                      |          |           |
